# Supplementary material for: WHSC1/NSD2 regulates immune infiltration in prostate cancer
Source: PubMed Central journal article supplement — J Immunother Cancer. 2021 Feb 15;9(2):e001374. doi: 10.1136/jitc-2020-001374 (PMC7887377; doi:10.1136/jitc-2020-001374), 2021-02-15
Supplement: jitc-2020-001374supp001.pdf [file jitc-2020-001374supp001.pdf]

**Table S1**

| <b>Variable</b>                       | <b>Value *</b>                                                                   |
|---------------------------------------|----------------------------------------------------------------------------------|
| <b>Age</b>                            | 61.006 +/- 6.82                                                                  |
| <b>Sex</b>                            | male = 500                                                                       |
| <b>Race</b>                           | Asian = 2<br>Black or African American = 7<br>White = 147<br>Not available = 344 |
| <b>Overall Survival (months)</b>      | 35.87 +/- 25.96                                                                  |
| <b>Disease Free Survival (months)</b> | 32.3 +/- 24.96<br>Not available = 6                                              |
| <b>Gleason Score</b>                  | 6 = 45<br>7 = 250<br>8 = 64<br>9 = 137<br>10 = 4                                 |
| <b>Pathological T stage</b>           | T2a = 13<br>T2b = 10<br>T2c = 165<br>T3a = 159<br>T3b = 136<br>T4 = 10           |
| <b>Last PSA recording</b>             | 1.742 ng/mL +/- 15.8                                                             |

\* Mean +/- sd for continuous variables
