# Supplementary material for: WHSC1/NSD2 regulates immune infiltration in prostate cancer
Source: PubMed Central journal article supplement — J Immunother Cancer. 2021 Feb 15;9(2):e001374. doi: 10.1136/jitc-2020-001374 (PMC7887377; doi:10.1136/jitc-2020-001374), 2021-02-15
Supplement: jitc-2020-001374supp007.pdf [file jitc-2020-001374supp007.pdf]

**Table S2**

| Name            | FW primer                            | RW primer                               |
|-----------------|--------------------------------------|-----------------------------------------|
| <b>Hu_WHSC1</b> | Forward: 5'-AGCAACGAAAAATCTGTCTG-3'  | Reverse: 3'-ACTTTTGCTAAACCCAAGAG-5'     |
| <b>Hu_GAPDH</b> | Forward: 5'-ACAGTTGCCATGTAGACC-3'    | Reverse: 3'--TTGAGCACAGGGTACTTTA-5'     |
| <b>Hu_PDL1</b>  | Forward: 5'-TCACTTGGTAATTCTGGGAGC-3' | Reverse: 3'-CTTTGAGTTTGTATCTTGGATGCC-5' |
| <b>Hu_DNMT1</b> | Forward: 5'-ATGCCGCGCCGTACCGC-3'     | Reverse: 3'-CAACATACAAAGCTTGATCTCC-5'   |
