# Supplementary figures and images for: WHSC1/NSD2 regulates immune infiltration in prostate cancer
Source: PubMed Central journal article supplement — J Immunother Cancer. 2021 Feb 15;9(2):e001374. doi: 10.1136/jitc-2020-001374 (PMC7887377; doi:10.1136/jitc-2020-001374), 2021-02-15

# Figure S1

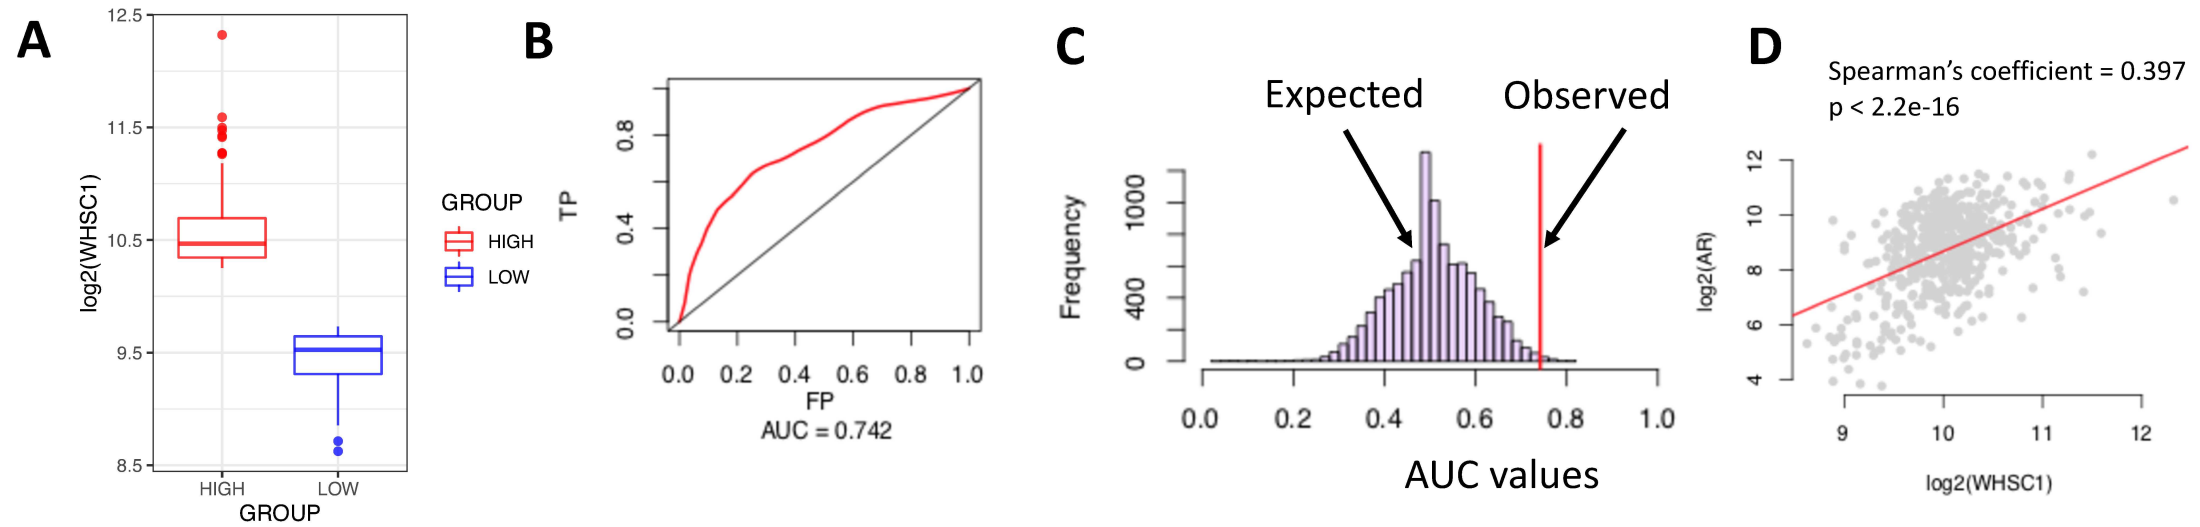

Supplement: jitc-2020-001374supp003.pdf [file jitc-2020-001374supp003.pdf]

## Figure S2

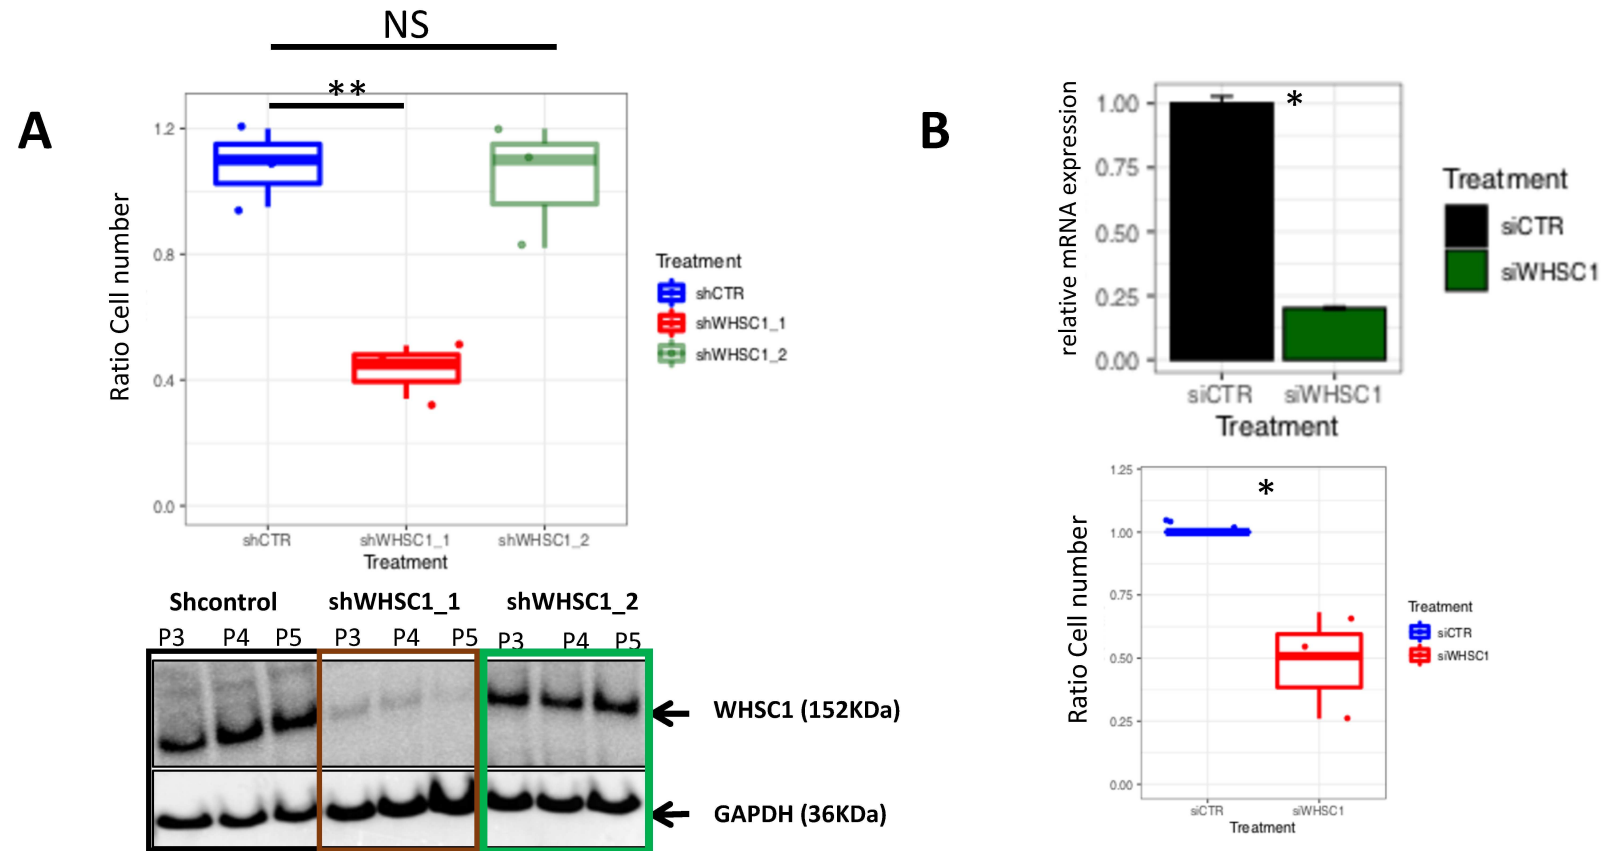

Supplement: jitc-2020-001374supp004.pdf [file jitc-2020-001374supp004.pdf]

Figure S4

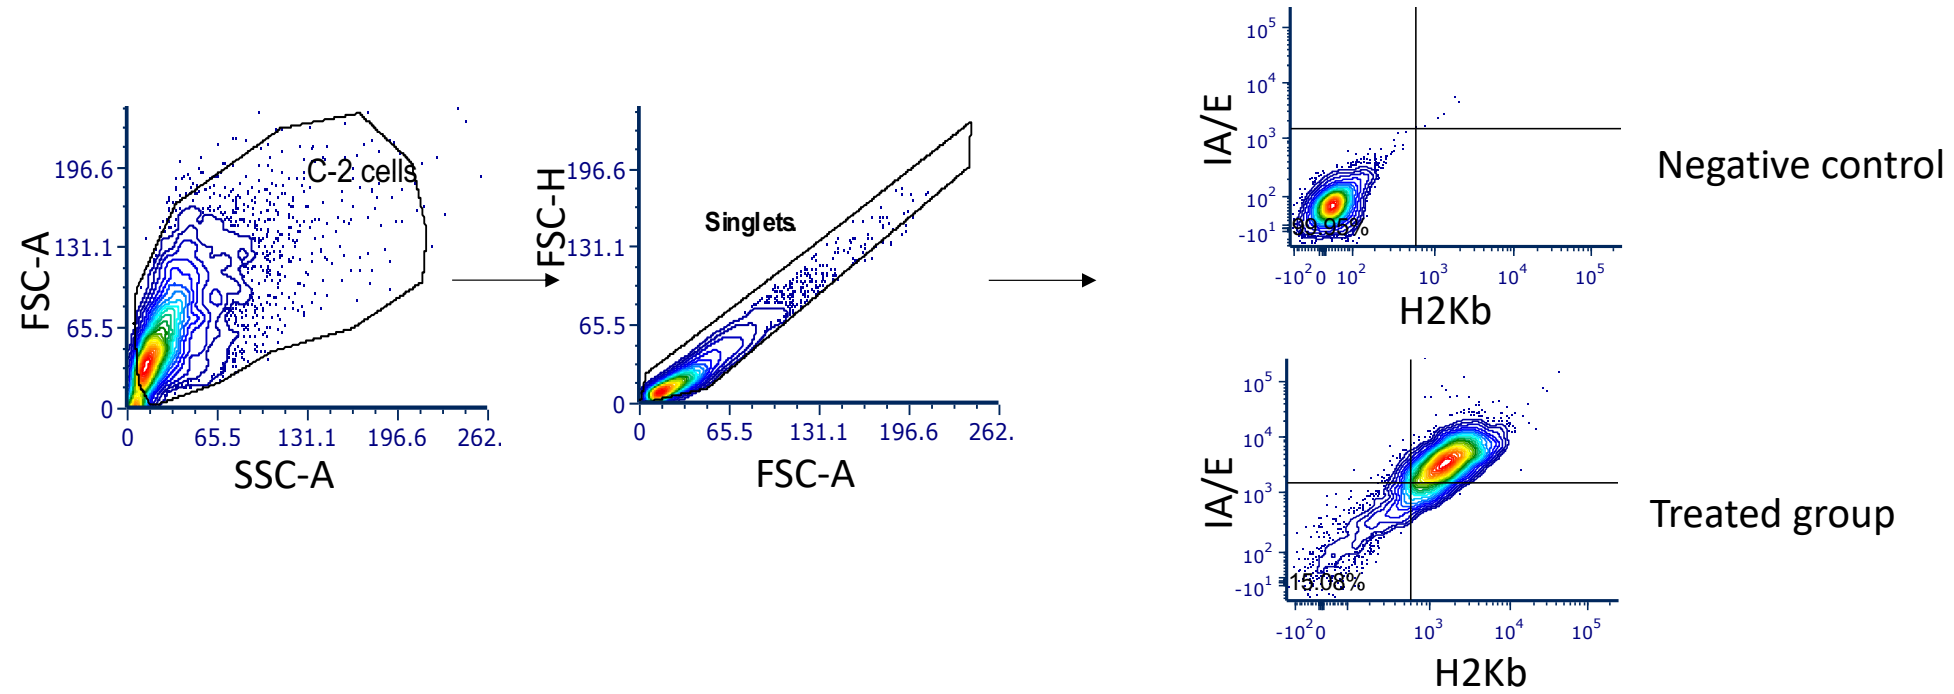

Supplement: jitc-2020-001374supp009.pdf [file jitc-2020-001374supp009.pdf]
